# Supplementary material for: A combined experimental and theoretical investigation of the excited-state dynamics of 2,4,6-trinitrotoluene (TNT) in DMSO solvent
Source: Royal Society of Chemistry journal article supplement (doi:10.1039/d1cp01782a), 2021-01-01
Supplement: d1cp01782a1.pdf [file d1cp01782a1.pdf]

## Supporting Information

### A combined experimental and theoretical investigation on the excited-state dynamics of 2,4,6-trinitrotoluene (TNT) in DMSO solvent

Runze Liu<sup>a,†</sup>, Fangjian Shang<sup>b,c,†</sup>, Ying Xiong<sup>d</sup>, Chaoyang Zhang<sup>d</sup>, Songqiu Yang<sup>b</sup>, Panwang Zhou<sup>a,\*</sup>, and Jianyong Liu<sup>b,\*</sup>

<sup>a</sup> Institute of Molecular Sciences and Engineering, Shandong University, Qingdao 266235, P. R. China.

<sup>b</sup> State Key Laboratory of Molecular Reaction Dynamics, Dalian Institute of Chemical Physics, Chinese Academy of Sciences, Dalian 116023, P. R. China.

<sup>c</sup> University of the Chinese Academy of Sciences, Beijing 10049, P. R. China.

<sup>d</sup> Institute of Chemical Materials, China Academy of Engineering Physics, Mianyang 621900, P. R. China.

†These authors contribute to this work equally.

\*Corresponding author: [beam@dicp.ac.cn](mailto:beam@dicp.ac.cn); [pwzhou@sdu.edu.cn](mailto:pwzhou@sdu.edu.cn)

**Table S1.** Excitation energies (eV), Oscillator strengths  $f$ , and molecular orbital contributions to the excited state transitions, calculated at SMD/M06-2X/def2-TZVP level of theory at the optimized ground state geometry. (HOMO and LUMO are molecular orbitals of 58 and 59, respectively)

| state | Singlet    |          |       |        | state | Triplet    |          |       |     |
|-------|------------|----------|-------|--------|-------|------------|----------|-------|-----|
|       | transition | contrib. | E(eV) | $f$    |       | transition | contrib. | E(eV) | $f$ |
| 1     | 57→60      | 20.4%    | 4.043 | 0.0031 | 1     | 54→60      | 37.7%    | 2.856 | 0.0 |
|       | 49→60      | 19.2%    |       |        |       | 56→60      | 37.6%    |       |     |
|       | 52→61      | 15.0%    |       |        | 56→62 | 11.4%      |          |       |     |
|       | 50→61      | 9.8%     |       |        | 55→59 | 39.3%      | 2.858    | 0.0   |     |
| 2     | 49→61      | 19.8%    | 4.046 | 0.0186 | 2     | 55→61      | 36.1%    |       |     |
|       | 52→60      | 17.4%    |       |        |       | 56→62      | 11.0%    |       |     |
|       | 57→61      | 15.2%    |       |        | 3     | 55→59      | 65.8%    | 2.868 | 0.0 |
|       | 50→60      | 12.0%    |       |        |       | 55→61      | 22.5%    |       |     |
| 3     | 53→59      | 43.0%    | 4.072 | 0.0000 | 4     | 55→63      | 15.3%    |       |     |
|       | 51→59      | 22.0%    |       |        |       | 57→60      | 33.0%    | 3.466 | 0.0 |
|       | 53→61      | 13.0%    |       |        | 52→61 | 13.4%      |          |       |     |
| 4     | 51→61      | 22.3%    | 4.523 | 0.0008 | 5     | 58→59      | 12.7%    |       |     |
|       | 48→60      | 16.6%    |       |        |       | 49→61      | 19.4%    | 3.570 | 0.0 |
|       | 53→61      | 11.4%    |       |        | 52→60 | 16.9%      |          |       |     |
|       | 50→60      | 10.2%    |       |        | 57→60 | 16.4%      |          |       |     |
| 5     | 51→60      | 22.3%    | 4.531 | 0.0003 | 6     | 50→60      | 11.6%    |       |     |
|       | 48→61      | 21.0%    |       |        |       | 53→59      | 41.6%    | 3.628 | 0.0 |
|       | 53→60      | 12.2%    |       |        | 51→59 | 21.6%      |          |       |     |
| 6     | 48→59      | 28.4%    | 4.550 | 0.0001 | 7     | 53→61      | 13.3%    |       |     |
|       | 50→59      | 19.7%    |       |        |       | 58→59      | 62.4%    | 3.941 | 0.0 |
|       | 52→59      | 14.7%    |       |        |       |            |          |       |     |
| 7     | 57→59      | 46.5%    | 4.910 | 0.0009 |       |            |          |       |     |
|       | 58→60      | 44.3%    |       |        |       |            |          |       |     |
| 8     | 58→59      | 90.4%    | 5.224 | 0.2779 |       |            |          |       |     |
| 9     | 58→61      | 41.6%    | 5.628 | 0.3057 |       |            |          |       |     |

|    |       |       |       |        |  |  |  |  |  |
|----|-------|-------|-------|--------|--|--|--|--|--|
|    | 57→59 | 36.2% |       |        |  |  |  |  |  |
| 10 | 57→60 | 41.7% | 5.768 | 0.3157 |  |  |  |  |  |
|    | 58→61 | 28.5% |       |        |  |  |  |  |  |
|    | 49→60 | 13.4% |       |        |  |  |  |  |  |
| 11 | 58→61 | 62.3% | 6.006 | 0.0207 |  |  |  |  |  |
|    | 57→60 | 31.3% |       |        |  |  |  |  |  |
| 12 | 57→61 | 71.8% | 6.147 | 0.0452 |  |  |  |  |  |

**Table S2.** Excitation energies (eV), Oscillator strengths  $f$ , and molecular orbital contributions to the excited state transitions, calculated at SMD/M06-2X/def2-TZVP level of theory at the geometry of the optimized first singlet excited state  $S_1$ .

| state | Singlet    |          |       |        | state | Triplet    |          |       |     |
|-------|------------|----------|-------|--------|-------|------------|----------|-------|-----|
|       | transition | contrib. | E(eV) | $f$    |       | transition | contrib. | E(eV) | $f$ |
| 1     | 58→59      | 71.2%    | 2.019 | 0.0001 | 1     | 56→59      | 57.8%    | 0.881 | 0.0 |
|       | 55→59      | 16.1%    |       |        |       | 55→59      | 44.7%    |       |     |
|       |            |          |       | 56←59  |       | -16.0%     |          |       |     |
|       |            |          |       | 58→59  |       | 15.9%      |          |       |     |
|       |            |          |       | 55←59  |       | -15.5%     |          |       |     |
|       |            |          |       | 2      | 58←59 | 61.2%      | 1.608    | 0.0   |     |
|       |            |          |       |        | 55→59 | 27.0%      |          |       |     |
|       |            |          |       | 3      | 58→59 | 81.6%      | 2.787    | 0.0   |     |

**Figure S1.** Charge transfer analysis based on the hole and electron difference on the methylphenyl group (red) and nitro group (green).

$S_0-S_9$

Fragment 1: Hole 84.5%    Electron 31.12%    Diff 53.38%  
 Fragment 2: Hole 15.5%    Electron 68.88%

$S_0-S_{10}$

Fragment 1: Hole 87.11%    Electron 19.51%    Diff 67.60%  
 Fragment 2: Hole 12.89%    Electron 80.49%

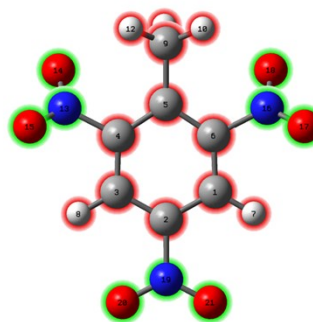

Fragment 1: methylphenyl group; (red region)  
 Fragment 2: Nitro groups (green region)

**Figure S2.** Optimized structures for the  $S_0$  state and  $S_1$  state for the DMSO solvated TNT molecule at SMD/M06-2X/def2-TZVP level.

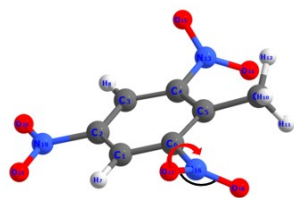

Optimized  $S_0$  state geometry

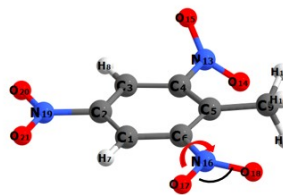

Optimized  $S_1$  state geometry

**Table S3.** Structural information for the optimized  $S_0$  and  $S_1$  state geometry.

|                              | $S_0$ state geometry | $S_1$ state geometry |
|------------------------------|----------------------|----------------------|
| D( $C_1-C_6-N_{16}-O_{17}$ ) | -40.94               | -2.27                |
| A( $O_{17}-N_{16}-O_{18}$ )  | 125.02               | 104.40               |
| B( $C_6-N_{16}$ )            | 1.478                | 1.368                |
| B( $N_{16}-O_{17}$ )         | 1.211                | 1.282                |

**Table S4.** Vertical excitations of DMSO solvated TNT at  $S_0$  minimum calculated using M06-2X and STEOM-CCSD with def2-TZVP basis set.

| Singlet state | M06-2X/def2-TZVP |        | STEOM-CCSD/def2-TZVP |        |
|---------------|------------------|--------|----------------------|--------|
|               | E(eV)            | $f$    | E(eV)                | $f$    |
| $S_1$         | 4.043            | 0.0031 | 3.923                | 0.0002 |
| $S_2$         | 4.046            | 0.0186 | 3.985                | 0.0134 |
| $S_3$         | 4.072            | 0.0000 | 3.990                | 0.0071 |
| $S_4$         | 4.522            | 0.0008 | 4.360                | 0.0000 |
| $S_5$         | 4.522            | 0.0008 | 5.362                | 0.3156 |
| Triplet state | M06-2X/def2-TZVP |        | STEOM-CCSD/def2-TZVP |        |
|               | E(eV)            | $f$    | E(eV)                | $f$    |
| $T_1$         | 2.856            | 0.0    | 3.245                | 0.0    |
| $T_2$         | 2.858            | 0.0    | 3.450                | 0.0    |
| $T_3$         | 2.869            | 0.0    | 3.489                | 0.0    |
| $T_4$         | 3.466            | 0.0    | 3.491                | 0.0    |
| $T_5$         | 3.570            | 0.0    | 3.767                | 0.0    |

**Table S5.** Vertical excitations of DMSO solvated TNT at S<sub>1</sub> minimum calculated using M06-2X and STEOM-CCSD with def2-TZVP basis set.

| Singlet state  | M06-2X |          | STEOM-CCSD |          |
|----------------|--------|----------|------------|----------|
|                | E(eV)  | <i>f</i> | E(eV)      | <i>f</i> |
| S <sub>1</sub> | 2.019  | 0.0001   | 1.933      | 0.0002   |
| S <sub>2</sub> | 4.013  | 0.0094   | 3.916      | 0.0025   |
| S <sub>3</sub> | 4.024  | 0.0000   | 3.947      | 0.0150   |
| S <sub>4</sub> | 4.452  | 0.0499   | 4.340      | 0.0880   |
| S <sub>5</sub> | 4.520  | 0.0088   | 5.300      | 0.2738   |
| Triplet state  | M06-2X |          | STEOM-CCSD |          |
|                | E(eV)  | <i>f</i> | E(eV)      | <i>f</i> |
| T <sub>1</sub> | 0.881  | 0.0      | 1.583      | 0.0      |
| T <sub>2</sub> | 1.601  | 0.0      | 2.070      | 0.0      |
| T <sub>3</sub> | 2.789  | 0.0      | 3.023      | 0.0      |
| T <sub>4</sub> | 3.315  | 0.0      | 3.517      | 0.0      |
| T <sub>5</sub> | 3.557  | 0.0      | 3.524      | 0.0      |

The geometry optimization for the  $S_0$ - $S_1$  PES conical intersection is performed based on the spin-flip TDDFT method with B3LYP functional and def2-TZVP basis set. The optimization is converged with the  $E_{CI}$  energy difference less than 0.0001 Hartree. Single point energy calculation than carried out at M06-2X/def2-TZVP level to compare with the  $S_{1-min}$  energy. All calculations employ CPCM/SMD solvent model to evaluate the solvent effect.

**Figure S3.** Optimized structure of the  $S_0$ - $S_1$  conical intersection.

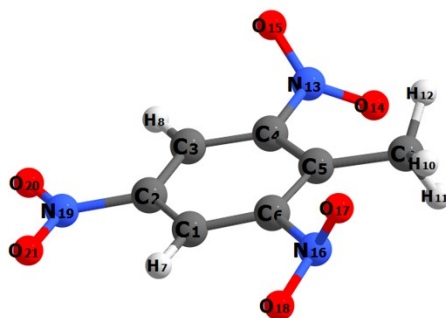

Optimized  $S_0$ - $S_1$  conical intersection structure

**Table S6.** Structural information for the optimized  $S_0$  and  $S_1$  conical intersection geometry.

|                                                                      | CI geometry |
|----------------------------------------------------------------------|-------------|
| D(C <sub>1</sub> -C <sub>6</sub> -N <sub>16</sub> -O <sub>17</sub> ) | -105.81     |
| A(O <sub>17</sub> -N <sub>16</sub> -O <sub>18</sub> )                | 91.59       |
| B(C <sub>6</sub> -N <sub>16</sub> )                                  | 1.428       |
| B(N <sub>16</sub> -O <sub>17</sub> )                                 | 1.320       |

**Figure S4.** Schematic view for the DMSO solvated TNT excited state dynamics from  $S_1$  to  $S_0$

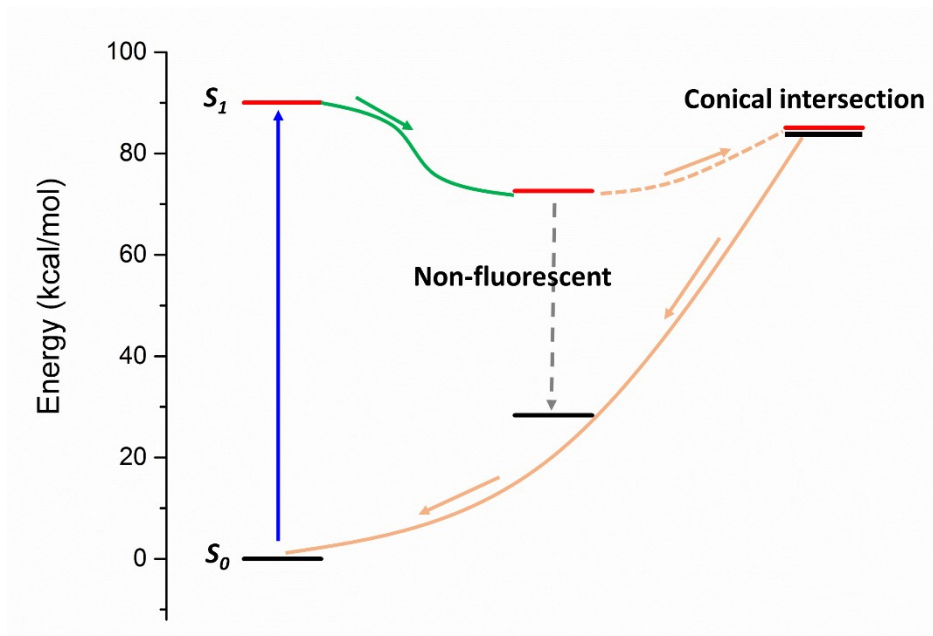

**Figure S5.** Hole-electron orbitals for TNT  $S_0$ - $S_1$  transition. Blue: *hole*; white: *electron*.

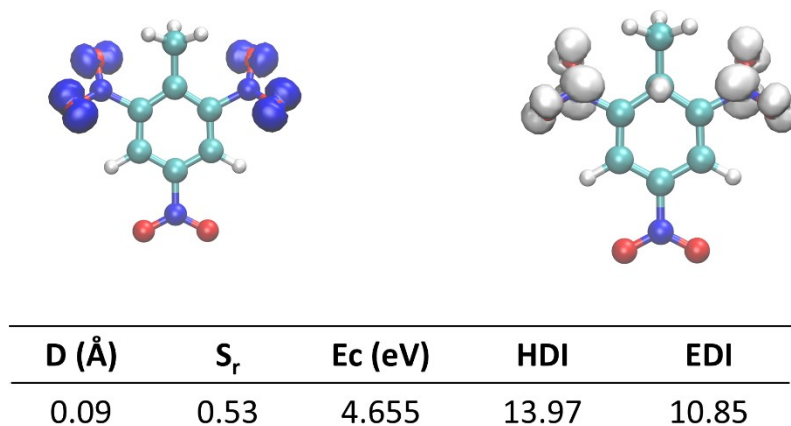

**Table S6.** The STEOM-CCSD/def2-TZVP calculated triplet states were shown

|                | E (Hartree) | MOs      |  | Contrib. |
|----------------|-------------|----------|--|----------|
| T <sub>1</sub> | 1.583       | 55 -> 59 |  | 70.5 %   |
| T <sub>2</sub> | 2.070       | 56 -> 59 |  | 70.4 %   |
| T <sub>3</sub> | 3.023       | 57 -> 59 |  | 45.0%    |

**Figure S6.**

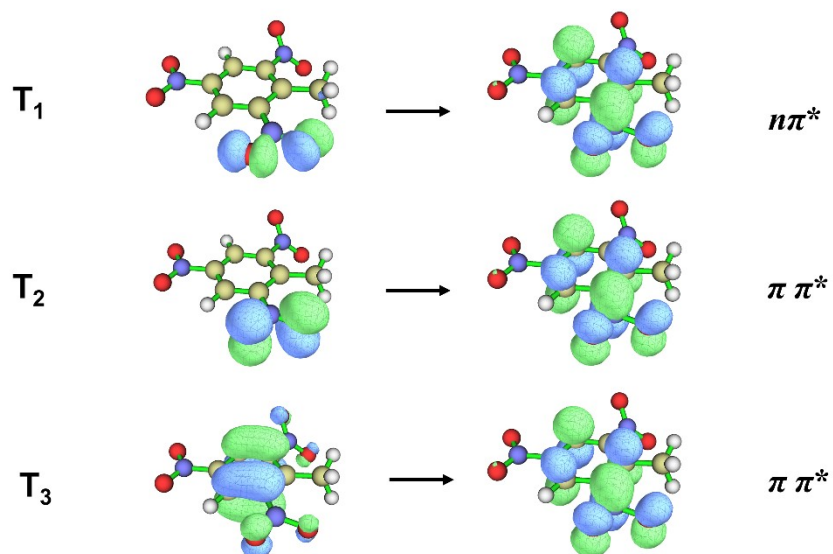

Cartesian coordinates for the key structures in the current theoretical study.

Optimized ground state geometry of TNT:

|   |             |             |             |
|---|-------------|-------------|-------------|
| C | -0.88147300 | -1.20676100 | -0.01385400 |
| C | -1.54834400 | 0.00004000  | -0.04075500 |
| C | -0.88141200 | 1.20681000  | -0.01385300 |
| C | 0.49745500  | 1.16846100  | 0.02594400  |
| C | 1.26167900  | -0.00003400 | 0.06711200  |
| C | 0.49739400  | -1.16848100 | 0.02594800  |
| H | -1.41330100 | -2.14826500 | -0.03208300 |
| H | -1.41319700 | 2.14834100  | -0.03208400 |
| C | 2.75238500  | -0.00010800 | 0.22837100  |
| H | 3.07592500  | -0.88218800 | 0.77563500  |
| H | 3.24078300  | -0.00014000 | -0.74662500 |
| H | 3.07603600  | 0.88192400  | 0.77563900  |
| N | 1.17080400  | 2.48367900  | 0.01297900  |
| O | 2.15099500  | 2.60471200  | -0.68827700 |
| O | 0.68167500  | 3.36703100  | 0.68299000  |
| N | 1.17068400  | -2.48372700 | 0.01300300  |
| O | 0.68133200  | -3.36713800 | 0.68277400  |
| O | 2.15103100  | -2.60472300 | -0.68804200 |
| N | -3.02118300 | 0.00007800  | -0.09515900 |
| O | -3.58214000 | 1.07384200  | -0.11529600 |
| O | -3.58220200 | -1.07365400 | -0.11536400 |

Optimized S<sub>1</sub> state geometry of TNT molecule

|   |             |             |             |
|---|-------------|-------------|-------------|
| C | -0.85151400 | -1.21378200 | -0.00962200 |
| C | -1.54731700 | -0.02980600 | -0.01372400 |
| C | -0.91483000 | 1.19831800  | 0.00234200  |
| C | 0.46919700  | 1.19945300  | 0.01374300  |
| C | 1.26782900  | 0.06214700  | 0.06188300  |
| C | 0.54698400  | -1.15892600 | 0.02778200  |
| H | -1.37082100 | -2.16277900 | -0.03881900 |
| H | -1.47509300 | 2.12301700  | -0.01057000 |
| C | 2.75352200  | 0.10320900  | 0.19196000  |
| H | 3.10113100  | -0.67983100 | 0.86688500  |
| H | 3.23431400  | -0.04745400 | -0.77913500 |
| H | 3.09615500  | 1.05687400  | 0.58796100  |
| N | 1.09329300  | 2.53202000  | -0.03116000 |
| O | 2.01542200  | 2.69522700  | -0.80361200 |
| O | 0.62341400  | 3.39103000  | 0.68672500  |
| N | 1.18606800  | -2.36810800 | 0.04507900  |
| O | 0.61463600  | -3.51538900 | 0.07131100  |
| O | 2.43102500  | -2.63548900 | -0.08173900 |
| N | -3.01539700 | -0.07137400 | -0.04987400 |
| O | -3.60728700 | 0.98911800  | -0.06844800 |
| O | -3.54929200 | -1.16215700 | -0.05684000 |



Optimized S<sub>0</sub>-S<sub>1</sub> conical intersection geometry

|   |           |           |           |
|---|-----------|-----------|-----------|
| C | -0.802423 | -1.213554 | -0.140431 |
| C | -1.525679 | -0.033951 | -0.138378 |
| C | -0.908861 | 1.195689  | -0.005490 |
| C | 0.473960  | 1.227581  | 0.085510  |
| C | 1.282687  | 0.086812  | 0.077607  |
| C | 0.577045  | -1.127089 | -0.015161 |
| H | -1.293659 | -2.172649 | -0.204924 |
| H | -1.485154 | 2.108224  | 0.013751  |
| C | 2.781027  | 0.113157  | 0.153557  |
| H | 3.177866  | -0.833070 | 0.510229  |
| H | 3.191370  | 0.303470  | -0.840850 |
| H | 3.130662  | 0.905569  | 0.812117  |
| N | 1.075708  | 2.574339  | 0.166183  |
| O | 2.083366  | 2.786488  | -0.487503 |
| O | 0.510517  | 3.398863  | 0.866378  |
| N | 1.330861  | -2.339374 | -0.046245 |
| O | 1.872965  | -2.872749 | 1.032754  |
| O | 0.738888  | -3.491639 | -0.363794 |
| N | -2.993004 | -0.089169 | -0.257267 |
| O | -3.599481 | 0.969450  | -0.307832 |
| O | -3.517225 | -1.191078 | -0.298086 |
